# Supplementary material
Source: Springer Nature journal article supplement (https://www.springermedizin.de/resource/supplementary/12933_2009_177_MOESM4_ESM.pdf/9539764)
Supplement: MOESM4 [file 9539764]

## Resting Neutrophils

## fMLP Stimulation

MFI

% Increase

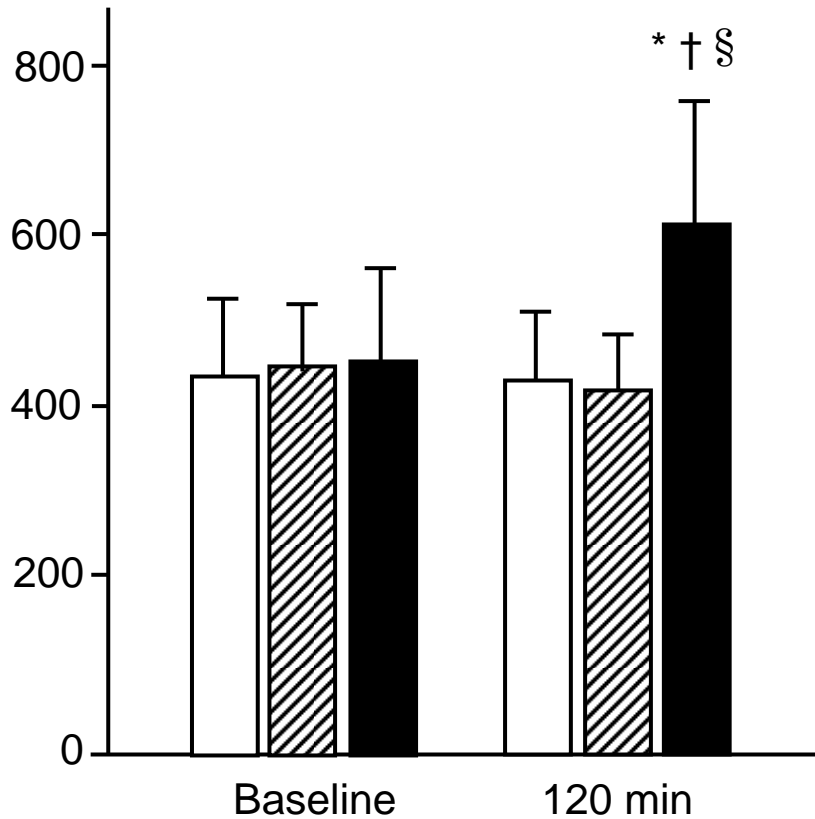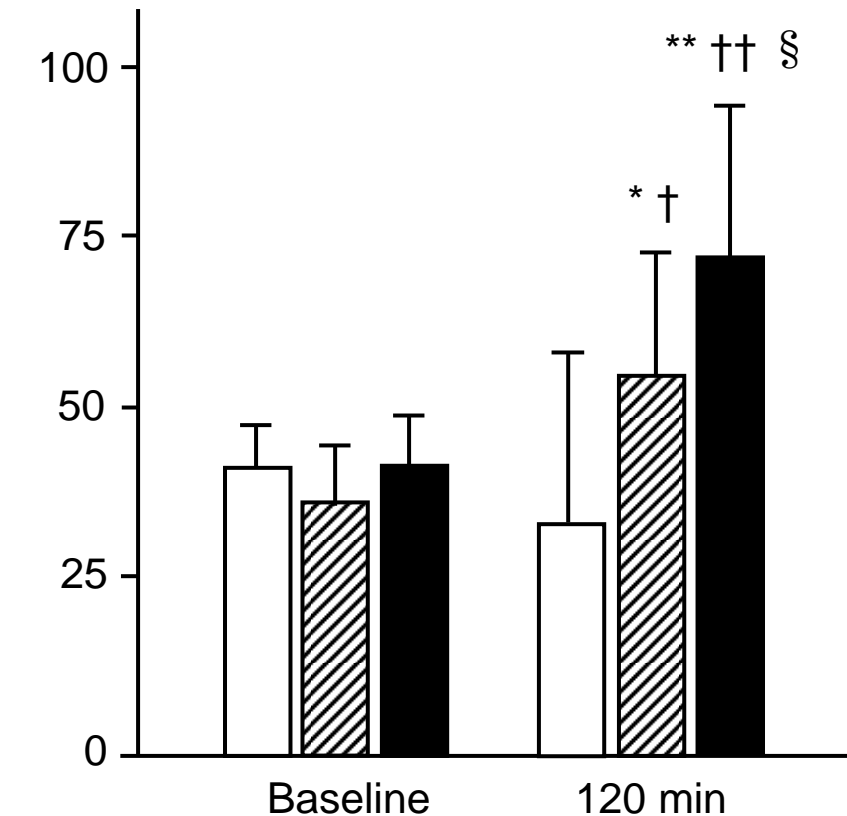

- Normal glucose tolerance (n=12)
- ▨ Impaired glucose tolerance (n=9)
- Postprandial hyperglycemia (n=11)

\* P<0.05, \*\* P<0.001 vs baseline

† P<0.05, †† P<0.01 vs normal glucose tolerance

§ P<0.05 vs impaired glucose tolerance
